# Supplementary material for: Impact of body composition on outcomes from anti-PD1 +/− anti-CTLA-4 treatment in melanoma
Source: PubMed Central journal article supplement — J Immunother Cancer. 2020 Aug 2;8(2):e000821. doi: 10.1136/jitc-2020-000821 (PMC7398101; doi:10.1136/jitc-2020-000821), 2020-08-02
Supplement: jitc-2020-000821supp001.pdf [file jitc-2020-000821supp001.pdf]

Supplementary Table 1. Patient demographics continued from Table 1 ( $n = 287$ ).

|                                                              | <b>Male (n=184)</b> | <b>Female (n=103)</b> | <b>Overall (n=287)</b> |
|--------------------------------------------------------------|---------------------|-----------------------|------------------------|
| <b>Skeletal muscle gauge (SMG), <math>n</math> (%)</b>       |                     |                       |                        |
| Low                                                          | 58 (31.5)           | 63 (61.2)             | 121 (42.2)             |
| High                                                         | 126 (68.5)          | 40 (38.8)             | 166 (57.8)             |
| <b>Total adipose tissue index (TATI), <math>n</math> (%)</b> |                     |                       |                        |
| First tertile                                                | 56 (30.4)           | 39 (37.9)             | 95 (33.1)              |
| Second tertile                                               | 67 (36.4)           | 29 (28.2)             | 96 (33.4)              |
| Third tertile                                                | 61 (33.2)           | 35 (34)               | 96 (33.4)              |
| <b>Visceral adipose tissue index (VATI)</b>                  |                     |                       |                        |
| Mean (SD)                                                    | 72.4 (40)           | 44.2 (32.5)           | 62.3 (39.8)            |
| Median (range)                                               | 71.3 (0.7-239)      | 37.1 (0.8-141)        | 58.7 (0.7-239)         |
| Mean (SD)                                                    | 68.9 (31.9)         | 93.7 (46.4)           | 77.8 (39.5)            |
| Median (range)                                               | 63.9 (2.3-177)      | 89.9 (11.4-267)       | 69.7 (2.3-267)         |

First TATI tertile: 3.8-106.2  $\text{cm}^2/\text{m}^2$

Second TATI tertile: 106.2-160.2  $\text{cm}^2/\text{m}^2$

Third TATI tertile: 160.2-364.9  $\text{cm}^2/\text{m}^2$
