# Supplementary material for: Impact of body composition on outcomes from anti-PD1 +/− anti-CTLA-4 treatment in melanoma
Source: PubMed Central journal article supplement — J Immunother Cancer. 2020 Aug 2;8(2):e000821. doi: 10.1136/jitc-2020-000821 (PMC7398101; doi:10.1136/jitc-2020-000821), 2020-08-02
Supplement: jitc-2020-000821supp002.pdf [file jitc-2020-000821supp002.pdf]

Supplementary Table 2. Chi-square analysis examining response, toxicities, Progression Free Survival (PFS) and Overall Survival (OS) in association with BMI and body composition

| <b><i>Response</i></b>   | <b><i>Objective response</i></b> | <b><i>No response</i></b>   | <b><i>p-value</i></b> |
|--------------------------|----------------------------------|-----------------------------|-----------------------|
| BMI                      | 27.80                            | 29.21                       | 0.25                  |
| SMI                      | 48.31                            | 44.57                       | 0.06                  |
| SMD                      | 34.65                            | 34.08                       | 0.54                  |
| SMG                      | 1666.415                         | 1566.47                     | 0.11                  |
| TATI                     | 128.79                           | 136.23                      | 0.4                   |
| <b><i>Toxicities</i></b> | <b><i>Toxicities</i></b>         | <b><i>No toxicities</i></b> | <b><i>p-value</i></b> |
| BMI                      | 28.44                            | 28.96                       | 0.37                  |
| SMI                      | 45.63                            | 46.28                       | 0.66                  |
| SMD                      | 33.94                            | 34.73                       | 0.56                  |
| SMG                      | 1544.94                          | 1644.68                     | 0.49                  |
| TATI                     | 132.44                           | 131.64                      | 0.48                  |

measures.

All values noted are medians. *P-values* ≤ 0.05 displayed in bold.
