# Supplementary material for: Impact of body composition on outcomes from anti-PD1 +/− anti-CTLA-4 treatment in melanoma
Source: PubMed Central journal article supplement — J Immunother Cancer. 2020 Aug 2;8(2):e000821. doi: 10.1136/jitc-2020-000821 (PMC7398101; doi:10.1136/jitc-2020-000821), 2020-08-02
Supplement: jitc-2020-000821supp003.pdf [file jitc-2020-000821supp003.pdf]

Supplementary Table 3. Univariable analyses examining response, toxicities, Progression Free Survival (PFS) and Overall Survival (OS) in association with BMI Class ( $n = 115$ ).

| <i>BMI Class (Class I used as reference)</i> | <i>OR</i> | <i>95% CI</i> | <i>p-value</i> |
|----------------------------------------------|-----------|---------------|----------------|
| <b>Response</b>                              |           |               |                |
| II                                           | 1.8       | 0.8-4.1       | 0.2            |
| III                                          | 0.4       | 0.1-2         | 0.3            |
| <b>Toxicities</b>                            |           |               |                |
| II                                           | 0.9       | 0.4-2.2       | 0.9            |
| III                                          | 0.9       | 0.2-3.2       | 0.8            |
| <b>Progression Free Survival</b>             |           |               |                |
| II                                           | 0.9       | 0.6-1.5       | 0.8            |
| III                                          | 1.8       | 0.92-3.6      | 0.1            |
| <b>Overall Survival</b>                      |           |               |                |
| II                                           | 1.2       | 0.7-2.1       | 0.6            |
| III                                          | 2.4       | 1.1-4.9       | <b>0.03</b>    |
