# Supplementary material for: Impact of body composition on outcomes from anti-PD1 +/− anti-CTLA-4 treatment in melanoma
Source: PubMed Central journal article supplement — J Immunother Cancer. 2020 Aug 2;8(2):e000821. doi: 10.1136/jitc-2020-000821 (PMC7398101; doi:10.1136/jitc-2020-000821), 2020-08-02

Supplementary Figure 1. Kaplan Meier curves for Progression Free Survival (PFS) and Overall Survival (OS) for BMI Classes.

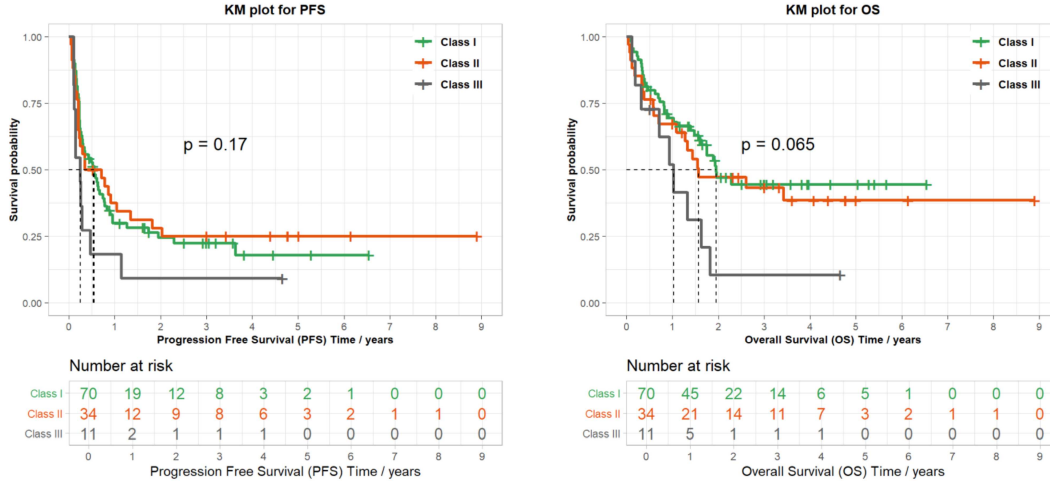

Supplement: jitc-2020-000821supp004.pdf [file jitc-2020-000821supp004.pdf]
