# Supplementary material for: Impact of body composition on outcomes from anti-PD1 +/− anti-CTLA-4 treatment in melanoma
Source: PubMed Central journal article supplement — J Immunother Cancer. 2020 Aug 2;8(2):e000821. doi: 10.1136/jitc-2020-000821 (PMC7398101; doi:10.1136/jitc-2020-000821), 2020-08-02
Supplement: jitc-2020-000821supp005.pdf [file jitc-2020-000821supp005.pdf]

Supplementary Table 4. Multivariable analysis of BMI stratified by treatment group

| <b>Response</b>            | <b>OR</b> | <b>95% CI</b> | <b>p-value</b> |
|----------------------------|-----------|---------------|----------------|
| <i>Total Cohort</i>        |           |               |                |
| Overweight vs Normal       | 0.84      | 0.45-1.60     | 0.60           |
| Obese vs Normal            | 0.58      | 0.31-1.09     | 0.09           |
| <i>Combination Therapy</i> |           |               |                |
| Overweight vs Normal       | 1.04      | 0.25-4.30     | 0.95           |
| Obese vs Normal            | 0.47      | 0.12-1.84     | 0.28           |
| <i>Monotherapy</i>         |           |               |                |
| Overweight vs Normal       | 0.79      | 0.38-1.66     | 0.54           |
| Obese vs Normal            | 0.64      | 0.31-1.32     | 0.23           |
| <b>PFS</b>                 | <b>HR</b> | <b>95% CI</b> | <b>p-value</b> |
| <i>Total Cohort</i>        |           |               |                |
| Overweight vs Normal       | 1.04      | 0.71-1.52     | 0.84           |
| Obese vs Normal            | 1.28      | 0.90-1.83     | 0.18           |
| <i>Combination Therapy</i> |           |               |                |
| Overweight vs Normal       | 1.31      | 0.53-3.19     | 0.56           |
| Obese vs Normal            | 1.64      | 0.69-3.91     | 0.26           |
| <i>Monotherapy</i>         |           |               |                |
| Overweight vs Normal       | 0.98      | 0.64-1.50     | 0.93           |
| Obese vs Normal            | 1.20      | 0.81-1.79     | 0.36           |
| <b>OS</b>                  | <b>HR</b> | <b>95% CI</b> | <b>p-value</b> |
| <i>Total Cohort</i>        |           |               |                |
| Overweight vs Normal       | 1.10      | 0.71-1.70     | 0.67           |
| Obese vs Normal            | 1.10      | 0.72-1.67     | 0.65           |
| <i>Combination Therapy</i> |           |               |                |
| Overweight vs Normal       | 0.91      | 0.30-2.74     | 0.86           |
| Obese vs Normal            | 1.31      | 0.50-3.43     | 0.58           |
| <i>Monotherapy</i>         |           |               |                |
| Overweight vs Normal       | 1.14      | 0.70-1.86     | 0.59           |
| Obese vs Normal            | 1.05      | 0.55-1.68     | 0.85           |

*Adjusted for age, stage, and prior therapy*
