# Supplementary material for: Impact of body composition on outcomes from anti-PD1 +/− anti-CTLA-4 treatment in melanoma
Source: PubMed Central journal article supplement — J Immunother Cancer. 2020 Aug 2;8(2):e000821. doi: 10.1136/jitc-2020-000821 (PMC7398101; doi:10.1136/jitc-2020-000821), 2020-08-02
Supplement: jitc-2020-000821supp006.pdf [file jitc-2020-000821supp006.pdf]

Supplementary Table 5. Correlation Between BMI and Body Composition Measures

|            | <b>BMI</b> | <b>VAT</b> | <b>SAT</b> | <b>SMG</b> | <b>TATI</b> | <b>SMI</b> |
|------------|------------|------------|------------|------------|-------------|------------|
| <b>BMI</b> | 1          | 0.68       | 0.77       | 0.15       | 0.88        | 0.49       |
| <b>VAT</b> | 0.68       | 1          | 0.38       | 0.036      | 0.83        | 0.36       |
| <b>SAT</b> | 0.77       | 0.38       | 1          | -0.14      | 0.83        | 0.080      |
| <b>SMG</b> | 0.15       | 0.036      | -0.14      | 1          | -0.06       | 0.81       |
