# Supplementary material for: Impact of body composition on outcomes from anti-PD1 +/− anti-CTLA-4 treatment in melanoma
Source: PubMed Central journal article supplement — J Immunother Cancer. 2020 Aug 2;8(2):e000821. doi: 10.1136/jitc-2020-000821 (PMC7398101; doi:10.1136/jitc-2020-000821), 2020-08-02
Supplement: jitc-2020-000821supp007.pdf [file jitc-2020-000821supp007.pdf]

Supplementary Table 6. Multivariable analysis of body composition measures stratified by treatment group

| <b>Response</b>            | <b>OR</b>   | <b>95% CI</b>    | <b>p-value</b> |
|----------------------------|-------------|------------------|----------------|
| <i>Total cohort</i>        |             |                  |                |
| SMG (High vs Low)          | 0.90        | 0.36-2.28        | 0.83           |
| TATI (Medium vs Low)       | 1.24        | 0.48-3.22        | 0.66           |
| TATI (High vs Low)         | 0.39        | 0.15-1.02        | 0.06           |
| <i>Combination Therapy</i> |             |                  |                |
| SMG (High vs Low)          | 0.89        | 0.07-11.1        | 0.93           |
| TATI (Medium vs Low)       | 0.47        | 0.04-5.88        | 0.56           |
| TATI (High vs Low)         | 0.95        | 0.07-12.70       | 0.97           |
| <i>Monotherapy</i>         |             |                  |                |
| SMG (High vs Low)          | 0.84        | 0.29-2.39        | 0.74           |
| TATI (Medium vs Low)       | 1.61        | 0.55-4.69        | 0.38           |
| <b>TATI (High vs Low)</b>  | <b>0.3</b>  | <b>0.10-0.90</b> | <b>0.032</b>   |
| <i>Total cohort</i>        |             |                  |                |
| SMG (High vs Low)          | 1.21        | 0.70-2.10        | 0.48           |
| TATI (Medium vs Low)       | 1.07        | 0.61-1.90        | 0.81           |
| <b>TATI (High vs Low)</b>  | <b>1.71</b> | <b>1.01-2.87</b> | <b>0.04</b>    |
| <i>Combination Therapy</i> |             |                  |                |
| SMG (High vs Low)          | 1.39        | 0.29-6.75        | 0.68           |
| TATI (Medium vs Low)       | 2.44        | 0.55-10.72       | 0.24           |
| TATI (High vs Low)         | 0.78        | 0.14-4.20        | 0.77           |
| <i>Monotherapy</i>         |             |                  |                |
| SMG (High vs Low)          | 1.23        | 0.68-2.22        | 0.5            |
| TATI (Medium vs Low)       | 0.9         | 0.47-1.71        | 0.74           |
| <b>TATI (High vs Low)</b>  | <b>2.01</b> | <b>1.14-3.55</b> | <b>0.016</b>   |
| <b>OS</b>                  | <b>HR</b>   | <b>95% CI</b>    | <b>p-value</b> |
| <i>Total Cohort</i>        |             |                  |                |
| SMG (High vs Low)          | 0.99        | 0.53-1.83        | 0.97           |
| TATI (Medium vs Low)       | 1.18        | 0.61-2.26        | 0.62           |
| TATI (High vs Low)         | 1.44        | 0.80-2.61        | 0.22           |
| <i>Combination Therapy</i> |             |                  |                |
| SMG (High vs Low)          | 2.18        | 0.34-13.98       | 0.41           |
| TATI (Medium vs Low)       | 2.73        | 0.43-17.21       | 0.28           |
| TATI (High vs Low)         | 1.08        | 0.15-7.98        | 0.94           |
| <i>Monotherapy</i>         |             |                  |                |

|                      |      |           |      |
|----------------------|------|-----------|------|
| SMG (High vs Low)    | 0.81 | 0.42-1.58 | 0.54 |
| TATI (Medium vs Low) | 1.04 | 0.51-2.12 | 0.91 |
| TATI (High vs Low)   | 1.43 | 0.76-2.70 | 0.27 |

*P-values*  $\leq 0.05$  displayed in bold.

Adjusted for age, sex, stage, prior treatment and SMG:TATI interaction term
