# Supplementary material for: Impact of body composition on outcomes from anti-PD1 +/− anti-CTLA-4 treatment in melanoma
Source: PubMed Central journal article supplement — J Immunother Cancer. 2020 Aug 2;8(2):e000821. doi: 10.1136/jitc-2020-000821 (PMC7398101; doi:10.1136/jitc-2020-000821), 2020-08-02
Supplement: jitc-2020-000821supp008.pdf [file jitc-2020-000821supp008.pdf]

Supplementary Table 7. SAT/VAT and Response, Progression Free Survival (PFS) and Overall Survival (OS).

| <b>Response</b>                           | <b>Interquartile OR</b> | <b>95% CI</b> | <b>p-value</b> |
|-------------------------------------------|-------------------------|---------------|----------------|
| <i>Total Cohort (n = 287)<sup>a</sup></i> |                         |               |                |
| High SAT vs low SAT                       | 0.70                    | 0.47-1.02     | 0.07           |
| High VAT vs low VAT                       | 1.18                    | 0.75-1.85     | 0.48           |
| <i>Males (n = 184)<sup>b</sup></i>        |                         |               |                |
| High SAT vs low SAT                       | 0.88                    | 0.53-1.49     | 0.64           |
| High VAT vs low VAT                       | 1.08                    | 0.65-1.80     | 0.77           |
| <i>Females (n = 103)<sup>b</sup></i>      |                         |               |                |
| High SAT vs low SAT                       | 0.54                    | 0.27-1.07     | 0.08           |
| High VAT vs low VAT                       | 1.27                    | 0.43-3.71     | 0.66           |
| <b>Progression Free Survival</b>          | <b>Interquartile HR</b> | <b>95% CI</b> | <b>p-value</b> |
| <i>Total Cohort (n = 287)<sup>a</sup></i> |                         |               |                |
| High SAT vs low SAT                       | 1.00                    | 1.00-1.01     | 0.19           |
| High VAT vs low VAT                       | 1.00                    | 0.99-1.00     | 0.61           |
| <i>Males (n = 184)<sup>b</sup></i>        |                         |               |                |
| High SAT vs low SAT                       | 1.00                    | 0.99-1.01     | 0.91           |
| High VAT vs low VAT                       | 1.00                    | 0.99-1.01     | 0.92           |
| <i>Females (n = 103)<sup>b</sup></i>      |                         |               |                |
| High SAT vs low SAT                       | 1.00                    | 1.00-1.01     | 0.16           |
| High VAT vs low VAT                       | 1.00                    | 0.99-1.01     | 0.84           |
| <b>Overall Survival</b>                   | <b>Interquartile HR</b> | <b>95% CI</b> | <b>p-value</b> |
| <i>Total Cohort (n = 287)<sup>a</sup></i> |                         |               |                |
| High SAT vs low SAT                       | 1.00                    | 1.00-1.01     | 0.24           |
| High VAT vs low VAT                       | 1.00                    | 0.99-1.00     | 0.59           |
| <i>Males (n = 184)<sup>b</sup></i>        |                         |               |                |
| High SAT vs low SAT                       | 1.00                    | 1.00-1.01     | 0.92           |
| High VAT vs low VAT                       | 1.00                    | 0.99-1.01     | 0.99           |
| <i>Females (n = 103)<sup>b</sup></i>      |                         |               |                |
| High SAT vs low SAT                       | 1.00                    | 1.00-1.01     | 0.26           |
| High VAT vs low VAT                       | 1.00                    | 0.98-1.01     | 0.72           |

High VAT: &gt;58.67

High SAT: &gt;69.65

*P-values ≤ 0.05 displayed in bold.*<sup>a</sup> adjusted for age, sex, stage, and prior treatment<sup>b</sup> adjusted for age, stage, and prior treatment
